# Supplementary material for: Diversification of the Histone Acetyltransferase GCN5 through Alternative Splicing in Brachypodium distachyon
Source: Front Plant Sci. 2017 Dec 21;8:2176. doi: 10.3389/fpls.2017.02176 (PMC5743026; doi:10.3389/fpls.2017.02176)
Supplement: Supplementary Table 1 — Primers used in this study. [file Table1.XLSX]

## Sheet: Sheet1
Cloning	Primer Name	Primer Sequence (5' - 3')	Target Gene	Vector
	Gcn5-BglII-F	TAA ATA AGA TCT ATG GAC GGC CTC GCC GCG	All Gcn5s	pAVA321
	Gcn5-BglII-R	TCC TCC AGA TCT CTA GTT CTT GGT TGA GGT CTG GG	Gcn5
	SGcn5-BglII-R	GCC GCC AGA TCT TTA ATA TTC CTC CAT CGT AGT CC	S-Gcn5
	LGcn5-BglII-R	TCC TCC AGA TCT TCA GGG ACA TTC TCT GGA TCC TG	L-Gcn5
	MCS1-Ada2-BamHI-F	AAT TAT GGA TCC ATG GGC CGG TCT CGC	Ada2	pDOE BiFC Vectors
	MCS1-Ada2-SpeI-R	GCG AGT ACT AGT AAC AGT TGG AGC CTC CAA C
	MCS3-Gcn5-RsrII-F	AAT ATA ATG CGG TCC GAC GGC CTC	All Gcn5s
	MCS3-Gcn5-AatII-R	AAT ATA GAC GTC TTG TTC TTG GTT GAG GTC TGG	Gcn5
	MCS3-SGcn5-AatII-R	ACT ATA GAC GTC GCA TAT TCC TCC ATC GTA GT	S-Gcn5
	MCS3-LGcn5-AatII-R	AAT ATA GAC GTC TTG GGA CAT TCT CTG GAT CC	L-Gcn5
qPCR	Primer Name	Primer Sequence (5' - 3')	Target Gene	Source
	BdGcn5-F (F1)	GCA ACA TGC CCG AGA TGC TGA TG	BdGcn5	This study
	BdGcn5-R (R1)	CTC TCT GAT CTT CTC ATC AAT AGC CTG CC
	BdSGcn5-F (F2)	GTT AAA GGC TAC GGA ACA AGG GTT TCA C	BdS-Gcn5
	BdSGcn5-R (R1)	CTC TCT GAT CTT CTC ATC AAT AGC CTG CC
	BdLGcn5-F (F3)	GGG TAC ATC AAG GAC TAC GAT GGA GG	BdL-Gcn5
	BdLGcn5-R (R2)	ACT AAT CCC TGC CTT TGA CGA CGA
	BdSamDC-F	TGCTAATCTGCTCCAATGGC	BdSamDC	Hong et al., 2008
	BdSamDC-R	GACGCAGCTGACCACCTAGA
	BdEF1-α-F	CCATCGATATTGCCTTGTGG	BdEF1-α
	BdEF1-α-R	GTCTGGCCATCCTTGGAGAT
	AtelF4-F	TGACCACACAGTCTCTGCAA	AtelF4	Kwon et al., 2014
	AtleF4-R	ACCAGGGAGACTTGTTGGAC
	AtTOC1β-F	GTATTTGACAGTTTAAAGCCCTCTG	AtTOC1β
	AtTOC1β-R	CGACAAGAGGAGGATCCTGAC
	Note: Underlined sequences represent restriction sites
